# Supplementary material for: The global, regional, and national economic consequences of stroke
Source: PubMed Central journal article supplement (PMC7614992; doi:10.1161/strokeaha.123.043131), 2023-07-27
Supplement: EMS178545-supplement-Supplemental_Publication_Material.pdf [file EMS178545-supplement-Supplemental_Publication_Material.pdf]

## SUPPLEMENTAL MATERIAL

**Supplemental Table 1.** ICD-10 codes included in the Global Burden of Disease study definition of stroke.

|            |                                                                                      |
|------------|--------------------------------------------------------------------------------------|
| <b>I60</b> | <b>Subarachnoid hemorrhage</b>                                                       |
| I60.0      | Subarachnoid hemorrhage from carotid siphon and bifurcation                          |
| I60.1      | Subarachnoid hemorrhage from middle cerebral artery                                  |
| I60.2      | Subarachnoid hemorrhage from anterior communicating artery                           |
| I60.3      | Subarachnoid hemorrhage from posterior communicating artery                          |
| I60.4      | Subarachnoid hemorrhage from basilar artery                                          |
| I60.5      | Subarachnoid hemorrhage from vertebral artery                                        |
| I60.6      | Subarachnoid hemorrhage from other intracranial arteries                             |
| I60.7      | Subarachnoid hemorrhage from intracranial artery, unspecified                        |
| I60.8      | Other subarachnoid hemorrhage                                                        |
| I60.9      | Subarachnoid hemorrhage, unspecified                                                 |
| <b>I61</b> | <b>Intracerebral hemorrhage</b>                                                      |
| I61.0      | Intracerebral hemorrhage in hemisphere, subcortical                                  |
| I61.1      | Intracerebral hemorrhage in hemisphere, cortical                                     |
| I61.2      | Intracerebral hemorrhage in hemisphere, unspecified                                  |
| I61.3      | Intracerebral hemorrhage in brain stem                                               |
| I61.4      | Intracerebral hemorrhage in cerebellum                                               |
| I61.5      | Intracerebral hemorrhage, intraventricular                                           |
| I61.6      | Intracerebral hemorrhage, multiple localized                                         |
| I61.8      | Other intracerebral hemorrhage                                                       |
| I61.9      | Intracerebral hemorrhage, unspecified                                                |
| <b>I63</b> | <b>Cerebral infarction</b>                                                           |
| I63.0      | Cerebral infarction due to thrombosis of precerebral arteries                        |
| I63.1      | Cerebral infarction due to embolism of precerebral arteries                          |
| I63.2      | Cerebral infarction due to unspecified occlusion or stenosis of precerebral arteries |
| I63.3      | Cerebral infarction due to thrombosis of cerebral arteries                           |
| I63.4      | Cerebral infarction due to embolism of cerebral arteries                             |
| I63.5      | Cerebral infarction due to unspecified occlusion or stenosis of cerebral arteries    |
| I63.6      | Cerebral infarction due to cerebral venous thrombosis, nonpyogenic                   |
| I63.8      | Other cerebral infarction                                                            |
| I63.9      | Cerebral infarction, unspecified                                                     |
| <b>I64</b> | <b>Stroke, not specified as hemorrhage or infarction</b>                             |
| <b>I69</b> | <b>Sequelae of cerebrovascular disease</b>                                           |
| I69.0      | Sequelae of subarachnoid hemorrhage                                                  |
| I69.1      | Sequelae of intracerebral hemorrhage                                                 |
| I69.3      | Sequelae of cerebral infarction                                                      |

### Value of Lost Welfare by Country

■ Intracerebral Hemorrhage ■ Ischemic Stroke ■ Subarachnoid Hemorrhage

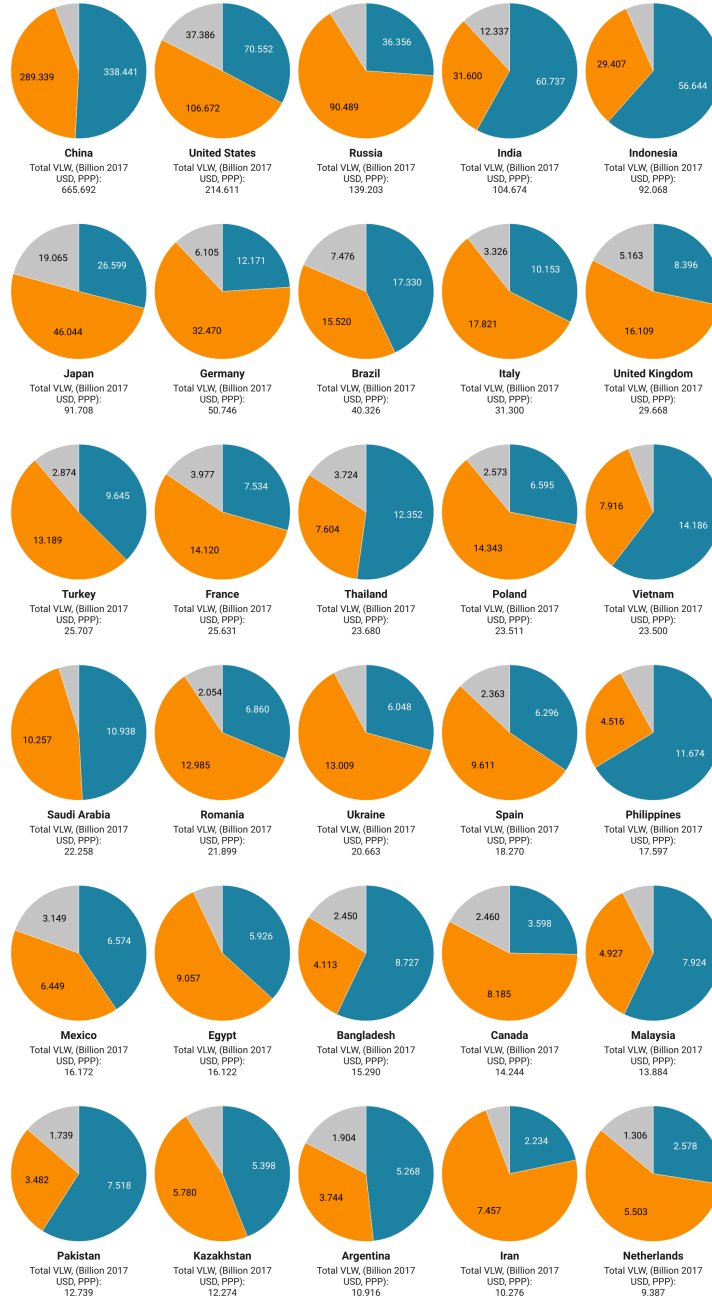

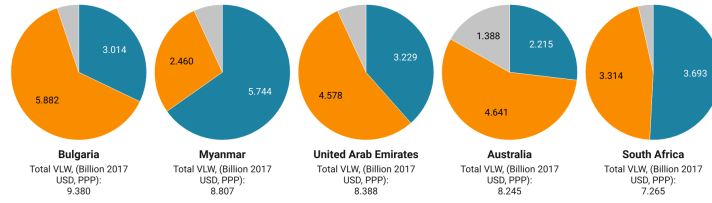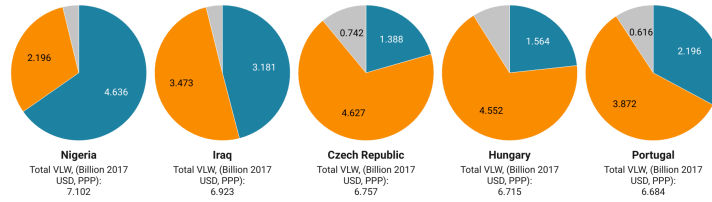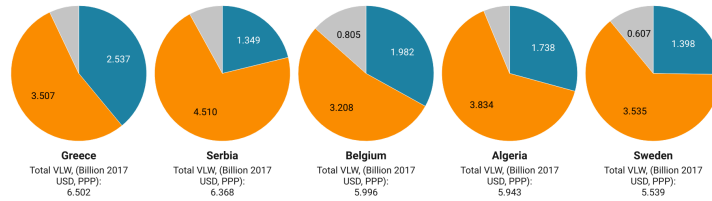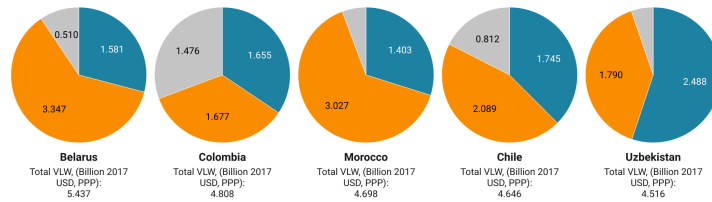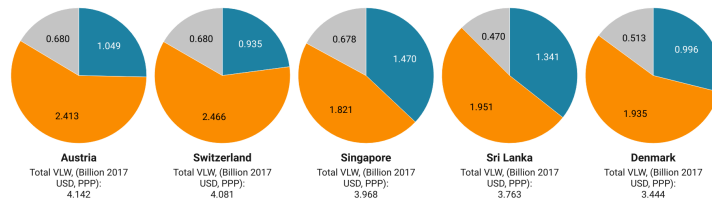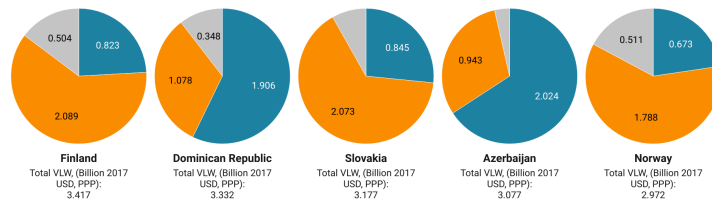

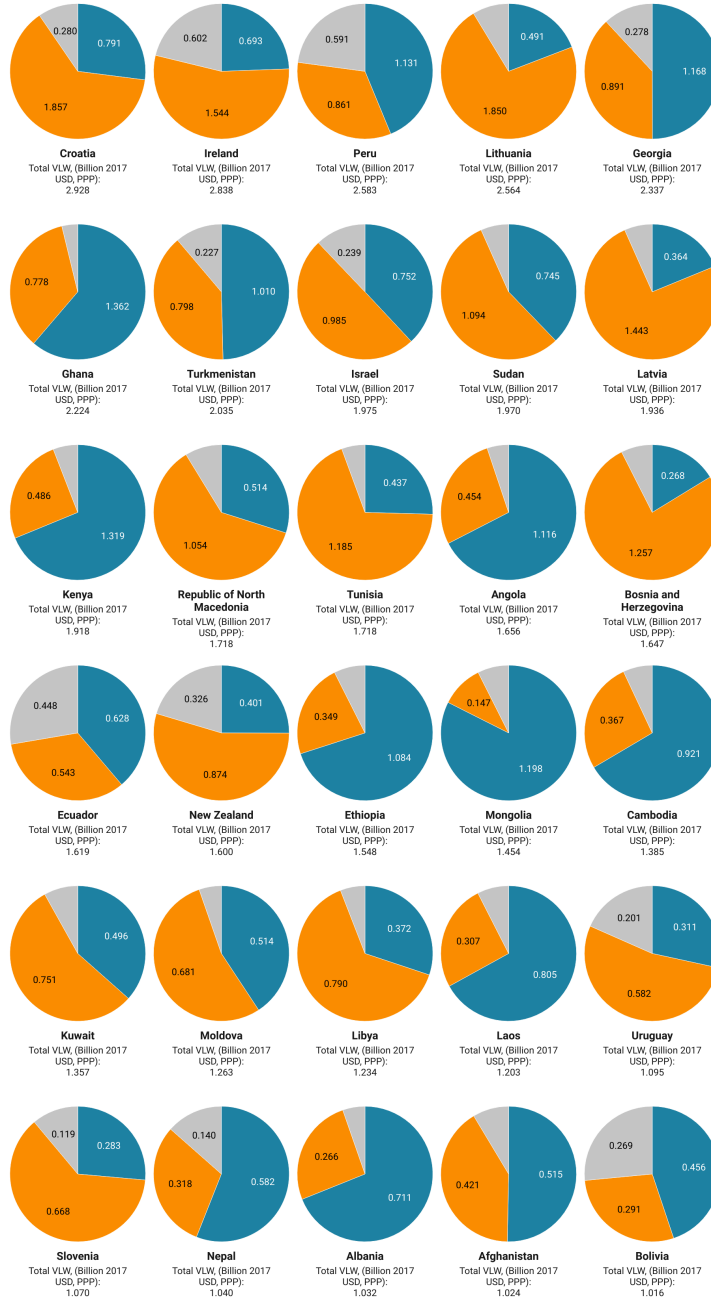

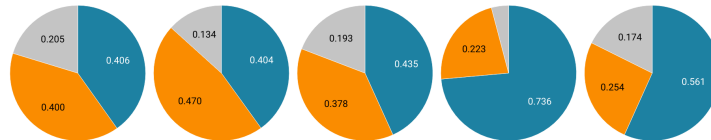

Qatar Total VLW, (Billion 2017 USD, PPP): 1.012  
 Puerto Rico Total VLW, (Billion 2017 USD, PPP): 1.008  
 Panama Total VLW, (Billion 2017 USD, PPP): 1.006  
 Cameroon Total VLW, (Billion 2017 USD, PPP): 1.001  
 Guatemala Total VLW, (Billion 2017 USD, PPP): 0.989

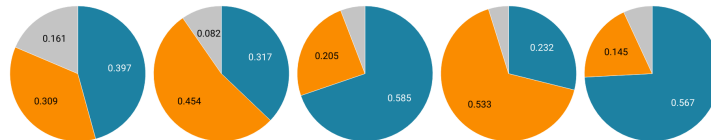

Paraguay Total VLW, (Billion 2017 USD, PPP): 0.868  
 Oman Total VLW, (Billion 2017 USD, PPP): 0.853  
 Democratic Republic of the Congo Total VLW, (Billion 2017 USD, PPP): 0.839  
 Jordan Total VLW, (Billion 2017 USD, PPP): 0.804  
 Madagascar Total VLW, (Billion 2017 USD, PPP): 0.765

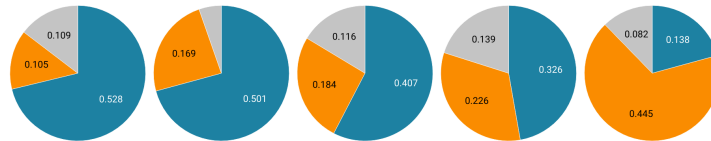

Papua New Guinea Total VLW, (Billion 2017 USD, PPP): 0.742  
 Zambia Total VLW, (Billion 2017 USD, PPP): 0.708  
 Haiti Total VLW, (Billion 2017 USD, PPP): 0.707  
 Honduras Total VLW, (Billion 2017 USD, PPP): 0.691  
 Estonia Total VLW, (Billion 2017 USD, PPP): 0.664

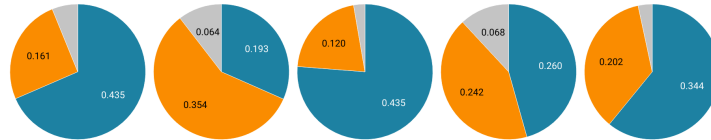

Uganda Total VLW, (Billion 2017 USD, PPP): 0.636  
 Armenia Total VLW, (Billion 2017 USD, PPP): 0.611  
 Montenegro Total VLW, (Billion 2017 USD, PPP): 0.570  
 Kyrgyzstan Total VLW, (Billion 2017 USD, PPP): 0.570  
 Botswana Total VLW, (Billion 2017 USD, PPP): 0.564

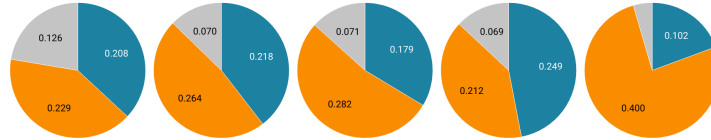

Costa Rica Total VLW, (Billion 2017 USD, PPP): 0.562  
 Trinidad and Tobago Total VLW, (Billion 2017 USD, PPP): 0.552  
 Luxembourg Total VLW, (Billion 2017 USD, PPP): 0.531  
 Mauritius Total VLW, (Billion 2017 USD, PPP): 0.530  
 Lebanon Total VLW, (Billion 2017 USD, PPP): 0.526

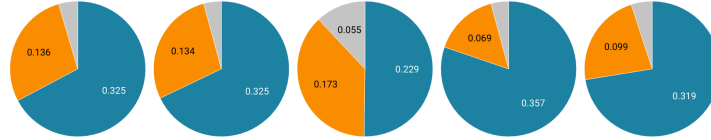

Mozambique Total VLW, (Billion 2017 USD, PPP): 0.484  
 Senegal Total VLW, (Billion 2017 USD, PPP): 0.479  
 Jamaica Total VLW, (Billion 2017 USD, PPP): 0.457  
 Tajikistan Total VLW, (Billion 2017 USD, PPP): 0.445  
 Mali Total VLW, (Billion 2017 USD, PPP): 0.441

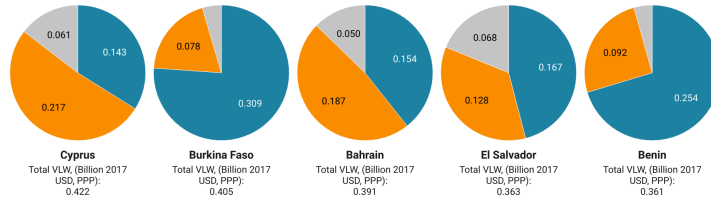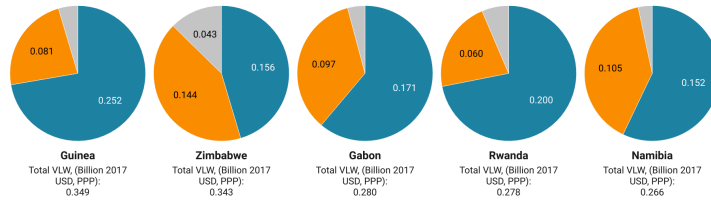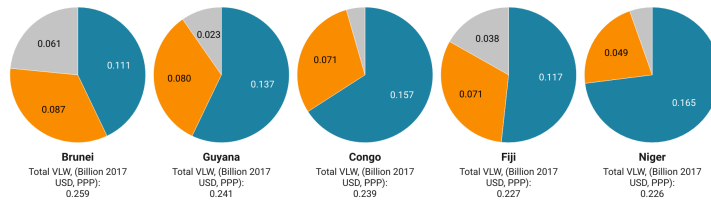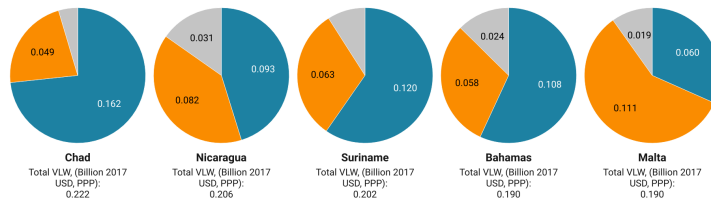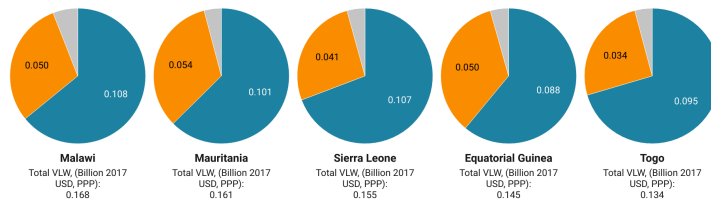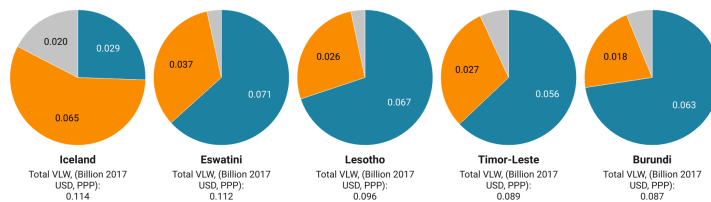

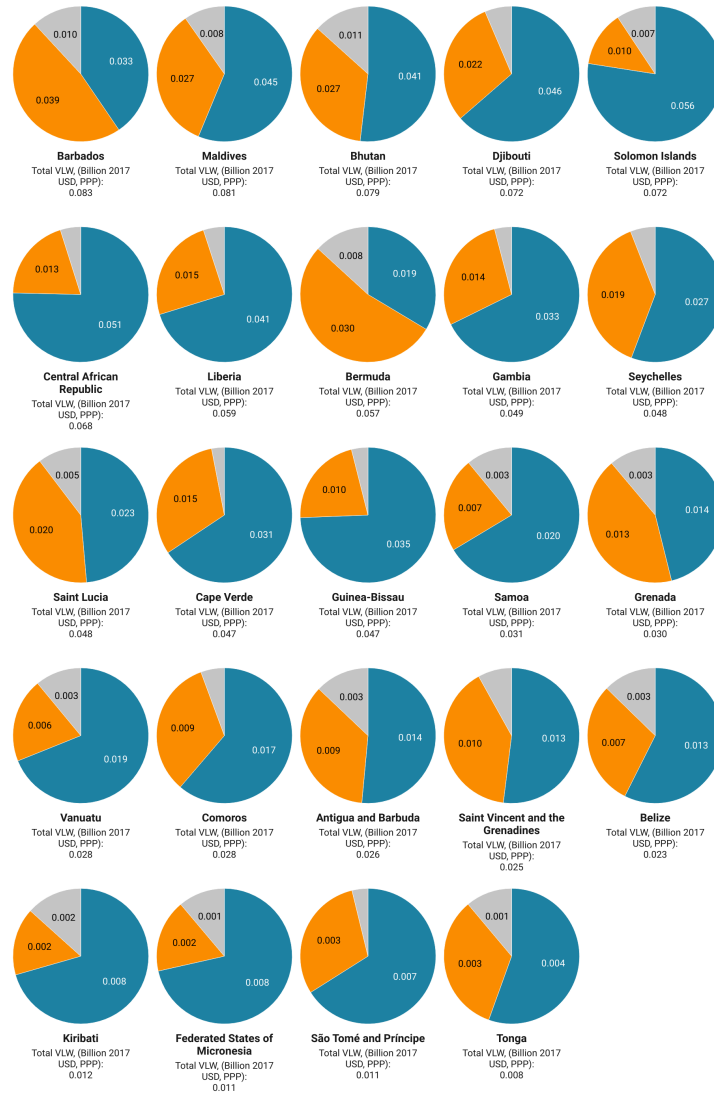

**Supplementary Figure 1.** Pie charts for individual countries displaying the relative proportion of stroke subtypes (ischemic stroke, intracerebral hemorrhage and subarachnoid hemorrhage) as a share of total stroke country VLW (2017 USD, PPP).

**Supplemental Table 2.** VLW and VLW/GDP in 2019 for stroke overall, ischemic stroke, intracerebral hemorrhage, and subarachnoid hemorrhage, generated using income elasticity (IE) at 0.55. All \$ values are in 2017 USD, PPP.

| IE = 0.55              |                                               | Stroke Overall   |             | Intracerebral Hemorrhage |             | Ischemic Stroke  |             | Subarachnoid Hemorrhage |             |
|------------------------|-----------------------------------------------|------------------|-------------|--------------------------|-------------|------------------|-------------|-------------------------|-------------|
| Country                | Region                                        | VLW (\$ billion) | VLW/GDP (%) | VLW (\$ billion)         | VLW/GDP (%) | VLW (\$ billion) | VLW/GDP (%) | VLW (\$ billion)        | VLW/GDP (%) |
| Afghanistan            | North Africa & Middle East                    | 4.75             | 6.05        | 2.39                     | 3.04        | 1.95             | 2.49        | 0.41                    | 0.52        |
| Albania                | Central Europe, Eastern Europe & Central Asia | 2.05             | 5.24        | 1.41                     | 3.61        | 0.53             | 1.35        | 0.11                    | 0.28        |
| Algeria                | North Africa & Middle East                    | 12.73            | 2.57        | 3.72                     | 0.75        | 8.21             | 1.66        | 0.79                    | 0.16        |
| Angola                 | Sub-Saharan Africa                            | 4.53             | 2.14        | 3.06                     | 1.44        | 1.24             | 0.59        | 0.23                    | 0.11        |
| Antigua and Barbuda    | Latin America & Caribbean                     | 0.04             | 2.03        | 0.02                     | 1.05        | 0.02             | 0.72        | 0.005                   | 0.26        |
| Argentina              | High Income                                   | 17.45            | 1.76        | 8.42                     | 0.85        | 5.98             | 0.60        | 3.04                    | 0.31        |
| Armenia                | Central Europe, Eastern Europe & Central Asia | 1.21             | 3.00        | 0.38                     | 0.95        | 0.70             | 1.74        | 0.13                    | 0.31        |
| Australia              | High Income                                   | 9.16             | 0.73        | 2.46                     | 0.20        | 5.16             | 0.41        | 1.54                    | 0.12        |
| Austria                | High Income                                   | 4.36             | 0.88        | 1.10                     | 0.22        | 2.54             | 0.51        | 0.72                    | 0.14        |
| Azerbaijan             | Central Europe, Eastern Europe & Central Asia | 5.95             | 4.11        | 3.92                     | 2.70        | 1.82             | 1.26        | 0.21                    | 0.15        |
| Bahamas                | Latin America & Caribbean                     | 0.24             | 1.66        | 0.14                     | 0.95        | 0.07             | 0.51        | 0.03                    | 0.21        |
| Bahrain                | North Africa & Middle East                    | 0.45             | 0.61        | 0.18                     | 0.24        | 0.22             | 0.29        | 0.06                    | 0.08        |
| Bangladesh             | South Asia                                    | 48.76            | 6.29        | 27.83                    | 3.59        | 13.12            | 1.69        | 7.81                    | 1.01        |
| Barbados               | Latin America & Caribbean                     | 0.15             | 3.44        | 0.06                     | 1.39        | 0.07             | 1.64        | 0.02                    | 0.41        |
| Belarus                | Central Europe, Eastern Europe & Central Asia | 9.23             | 5.08        | 2.69                     | 1.48        | 5.68             | 3.13        | 0.87                    | 0.48        |
| Belgium                | High Income                                   | 6.53             | 1.10        | 2.16                     | 0.36        | 3.49             | 0.59        | 0.88                    | 0.15        |
| Belize                 | Latin America & Caribbean                     | 0.06             | 2.22        | 0.04                     | 1.28        | 0.02             | 0.66        | 0.008                   | 0.28        |
| Benin                  | Sub-Saharan Africa                            | 1.36             | 3.51        | 0.96                     | 2.47        | 0.34             | 0.89        | 0.06                    | 0.15        |
| Bermuda                | Latin America & Caribbean                     | 0.05             | 0.97        | 0.02                     | 0.33        | 0.03             | 0.52        | 0.007                   | 0.13        |
| Bhutan                 | South Asia                                    | 0.17             | 1.85        | 0.09                     | 0.96        | 0.06             | 0.64        | 0.02                    | 0.25        |
| Bolivia                | Latin America & Caribbean                     | 2.47             | 2.45        | 1.11                     | 1.10        | 0.71             | 0.70        | 0.65                    | 0.65        |
| Bosnia and Herzegovina | Central Europe, Eastern Europe & Central Asia | 3.14             | 6.39        | 0.51                     | 1.04        | 2.40             | 4.87        | 0.23                    | 0.48        |
| Botswana               | Sub-Saharan Africa                            | 0.99             | 2.43        | 0.61                     | 1.48        | 0.36             | 0.87        | 0.03                    | 0.08        |
| Brazil                 | Latin America & Caribbean                     | 77.24            | 2.48        | 33.19                    | 1.07        | 29.73            | 0.95        | 14.32                   | 0.46        |
| Brunei                 | High Income                                   | 0.26             | 0.97        | 0.11                     | 0.41        | 0.09             | 0.33        | 0.06                    | 0.23        |
| Bulgaria               | Central Europe, Eastern Europe & Central Asia | 14.66            | 9.06        | 4.71                     | 2.91        | 9.19             | 5.68        | 0.76                    | 0.47        |
| Burkina Faso           | Sub-Saharan Africa                            | 1.84             | 4.15        | 1.40                     | 3.16        | 0.36             | 0.80        | 0.08                    | 0.19        |
| Burundi                | Sub-Saharan Africa                            | 0.64             | 7.34        | 0.46                     | 5.33        | 0.13             | 1.55        | 0.04                    | 0.46        |



|                                  |                                               |         |       |        |      |        |      |       |      |
|----------------------------------|-----------------------------------------------|---------|-------|--------|------|--------|------|-------|------|
| Cape Verde                       | Sub-Saharan Africa                            | 0.12    | 3.16  | 0.08   | 2.08 | 0.04   | 0.99 | 0.004 | 0.10 |
| Cambodia                         | Southeast Asia, East Asia, & Oceania          | 4.58    | 6.33  | 3.04   | 4.21 | 1.21   | 1.68 | 0.32  | 0.44 |
| Cameroon                         | Sub-Saharan Africa                            | 3.60    | 3.82  | 2.65   | 2.81 | 0.80   | 0.85 | 0.15  | 0.16 |
| Canada                           | High Income                                   | 15.90   | 0.86  | 4.02   | 0.22 | 9.13   | 0.50 | 2.75  | 0.15 |
| Central African Republic         | Sub-Saharan Africa                            | 0.45    | 10.03 | 0.34   | 7.56 | 0.09   | 1.98 | 0.02  | 0.49 |
| Chad                             | Sub-Saharan Africa                            | 1.16    | 4.61  | 0.85   | 3.38 | 0.26   | 1.02 | 0.05  | 0.21 |
| Chile                            | High Income                                   | 7.02    | 1.48  | 2.64   | 0.56 | 3.16   | 0.67 | 1.23  | 0.26 |
| China                            | Southeast Asia, East Asia, & Oceania          | 1226.35 | 5.45  | 623.48 | 2.77 | 533.02 | 2.37 | 69.84 | 0.31 |
| Colombia                         | Latin America & Caribbean                     | 9.26    | 1.26  | 3.19   | 0.43 | 3.23   | 0.44 | 2.84  | 0.39 |
| Comoros                          | Sub-Saharan Africa                            | 0.11    | 4.20  | 0.07   | 2.57 | 0.04   | 1.39 | 0.006 | 0.24 |
| Congo                            | Sub-Saharan Africa                            | 0.84    | 4.01  | 0.55   | 2.64 | 0.25   | 1.19 | 0.04  | 0.18 |
| Costa Rica                       | Latin America & Caribbean                     | 0.94    | 0.92  | 0.35   | 0.34 | 0.38   | 0.38 | 0.21  | 0.21 |
| Croatia                          | Central Europe, Eastern Europe & Central Asia | 4.15    | 3.55  | 1.12   | 0.96 | 2.64   | 2.25 | 0.40  | 0.34 |
| Cyprus                           | High Income                                   | 0.51    | 1.45  | 0.17   | 0.49 | 0.26   | 0.75 | 0.07  | 0.21 |
| Czech Republic                   | Central Europe, Eastern Europe & Central Asia | 8.17    | 1.87  | 1.68   | 0.38 | 5.60   | 1.28 | 0.90  | 0.21 |
| Democratic Republic of the Congo | Sub-Saharan Africa                            | 5.17    | 5.43  | 3.61   | 3.79 | 1.26   | 1.33 | 0.30  | 0.32 |
| Denmark                          | High Income                                   | 3.59    | 1.08  | 1.04   | 0.31 | 2.02   | 0.61 | 0.53  | 0.16 |
| Djibouti                         | Sub-Saharan Africa                            | 0.22    | 3.99  | 0.14   | 2.54 | 0.06   | 1.20 | 0.01  | 0.26 |
| Dominican Republic               | Latin America & Caribbean                     | 5.78    | 2.92  | 3.30   | 1.67 | 1.87   | 0.95 | 0.60  | 0.31 |
| Ecuador                          | Latin America & Caribbean                     | 3.49    | 1.77  | 1.35   | 0.68 | 1.17   | 0.59 | 0.97  | 0.49 |
| Egypt                            | North Africa & Middle East                    | 34.20   | 2.90  | 12.57  | 1.06 | 19.21  | 1.63 | 2.42  | 0.20 |
| El Salvador                      | Latin America & Caribbean                     | 0.88    | 1.55  | 0.40   | 0.71 | 0.31   | 0.55 | 0.17  | 0.29 |
| Equatorial Guinea                | Sub-Saharan Africa                            | 0.25    | 1.00  | 0.15   | 0.61 | 0.09   | 0.35 | 0.01  | 0.04 |
| Estonia                          | Central Europe, Eastern Europe & Central Asia | 0.85    | 1.75  | 0.18   | 0.36 | 0.57   | 1.17 | 0.10  | 0.21 |
| Eswatini                         | Sub-Saharan Africa                            | 0.27    | 2.77  | 0.17   | 1.75 | 0.09   | 0.92 | 0.009 | 0.09 |
| Ethiopia                         | Sub-Saharan Africa                            | 6.95    | 2.79  | 4.87   | 1.95 | 1.57   | 0.63 | 0.52  | 0.21 |
| Fiji                             | Southeast Asia, East Asia, & Oceania          | 0.45    | 3.69  | 0.23   | 1.91 | 0.14   | 1.16 | 0.08  | 0.62 |
| Finland                          | High Income                                   | 3.83    | 1.43  | 0.92   | 0.34 | 2.34   | 0.87 | 0.56  | 0.21 |
| France                           | High Income                                   | 29.43   | 0.95  | 8.65   | 0.28 | 16.21  | 0.52 | 4.57  | 0.15 |
| Gabon                            | Sub-Saharan Africa                            | 0.53    | 1.64  | 0.33   | 1.00 | 0.19   | 0.57 | 0.02  | 0.07 |
| Gambia                           | Sub-Saharan Africa                            | 0.22    | 4.19  | 0.15   | 2.83 | 0.06   | 1.18 | 0.009 | 0.17 |

|               |                                                     |        |       |        |       |       |      |       |      |
|---------------|-----------------------------------------------------|--------|-------|--------|-------|-------|------|-------|------|
| Georgia       | Central Europe,<br>Eastern Europe<br>& Central Asia | 4.45   | 7.97  | 2.22   | 3.98  | 1.70  | 3.04 | 0.53  | 0.95 |
| Germany       | High Income                                         | 54.30  | 1.21  | 13.02  | 0.29  | 34.75 | 0.78 | 6.53  | 0.15 |
| Ghana         | Sub-Saharan<br>Africa                               | 6.69   | 4.06  | 4.10   | 2.49  | 2.34  | 1.42 | 0.25  | 0.15 |
| Greece        | High Income                                         | 9.09   | 2.85  | 3.55   | 1.11  | 4.90  | 1.54 | 0.64  | 0.20 |
| Grenada       | Latin America &<br>Caribbean                        | 0.05   | 2.79  | 0.02   | 1.28  | 0.02  | 1.19 | 0.006 | 0.31 |
| Guatemala     | Latin America &<br>Caribbean                        | 2.41   | 1.68  | 1.37   | 0.95  | 0.62  | 0.43 | 0.42  | 0.30 |
| Guinea        | Sub-Saharan<br>Africa                               | 1.47   | 4.48  | 1.06   | 3.24  | 0.34  | 1.03 | 0.07  | 0.21 |
| Guinea-Bissau | Sub-Saharan<br>Africa                               | 0.22   | 5.99  | 0.17   | 4.45  | 0.05  | 1.30 | 0.009 | 0.24 |
| Guyana        | Latin America &<br>Caribbean                        | 0.49   | 4.75  | 0.28   | 2.71  | 0.16  | 1.58 | 0.05  | 0.46 |
| Haiti         | Latin America &<br>Caribbean                        | 2.81   | 8.60  | 1.62   | 4.96  | 0.73  | 2.24 | 0.46  | 1.41 |
| Honduras      | Latin America &<br>Caribbean                        | 2.03   | 3.62  | 0.96   | 1.71  | 0.66  | 1.18 | 0.41  | 0.73 |
| Hungary       | Central Europe,<br>Eastern Europe<br>& Central Asia | 9.01   | 2.83  | 2.10   | 0.66  | 6.11  | 1.92 | 0.80  | 0.25 |
| Iceland       | High Income                                         | 0.12   | 0.59  | 0.03   | 0.15  | 0.07  | 0.33 | 0.02  | 0.10 |
| India         | South Asia                                          | 285.71 | 3.11  | 165.78 | 1.81  | 86.25 | 0.94 | 33.68 | 0.37 |
| Indonesia     | Southeast Asia,<br>East Asia, &<br>Oceania          | 194.93 | 6.10  | 119.93 | 3.75  | 62.26 | 1.95 | 12.74 | 0.40 |
| Iran          | North Africa &<br>Middle East                       | 21.29  | 2.07  | 4.63   | 0.45  | 15.45 | 1.50 | 1.21  | 0.12 |
| Iraq          | North Africa &<br>Middle East                       | 15.25  | 3.59  | 7.01   | 1.65  | 7.65  | 1.80 | 0.59  | 0.14 |
| Ireland       | High Income                                         | 2.45   | 0.57  | 0.60   | 0.14  | 1.33  | 0.31 | 0.52  | 0.12 |
| Israel        | High Income                                         | 2.41   | 0.67  | 0.92   | 0.25  | 1.20  | 0.33 | 0.29  | 0.08 |
| Italy         | High Income                                         | 37.18  | 1.46  | 12.06  | 0.47  | 21.17 | 0.83 | 3.95  | 0.16 |
| Jamaica       | Latin America &<br>Caribbean                        | 1.05   | 3.65  | 0.53   | 1.83  | 0.40  | 1.38 | 0.13  | 0.44 |
| Japan         | High Income                                         | 110.33 | 2.11  | 32.00  | 0.61  | 55.40 | 1.06 | 22.94 | 0.44 |
| Jordan        | North Africa &<br>Middle East                       | 1.83   | 1.80  | 0.53   | 0.52  | 1.21  | 1.19 | 0.09  | 0.09 |
| Kazakhstan    | Central Europe,<br>Eastern Europe<br>& Central Asia | 18.11  | 3.71  | 7.97   | 1.63  | 8.53  | 1.75 | 1.62  | 0.33 |
| Kenya         | Sub-Saharan<br>Africa                               | 6.38   | 2.80  | 4.39   | 1.93  | 1.62  | 0.71 | 0.38  | 0.16 |
| Kiribati      | Southeast Asia,<br>East Asia, &<br>Oceania          | 0.05   | 19.62 | 0.04   | 13.84 | 0.008 | 3.17 | 0.007 | 2.61 |
| Kuwait        | North Africa &<br>Middle East                       | 1.50   | 0.72  | 0.55   | 0.26  | 0.83  | 0.40 | 0.12  | 0.06 |
| Kyrgyzstan    | Central Europe,<br>Eastern Europe<br>& Central Asia | 1.74   | 5.11  | 0.79   | 2.33  | 0.74  | 2.17 | 0.21  | 0.61 |
| Laos          | Southeast Asia,<br>East Asia, &<br>Oceania          | 3.05   | 5.40  | 2.05   | 3.62  | 0.78  | 1.38 | 0.23  | 0.40 |
| Latvia        | Central Europe,<br>Eastern Europe<br>& Central Asia | 2.66   | 4.51  | 0.50   | 0.85  | 1.98  | 3.36 | 0.18  | 0.30 |
| Lebanon       | North Africa &<br>Middle East                       | 1.01   | 1.02  | 0.20   | 0.20  | 0.77  | 0.77 | 0.05  | 0.05 |
| Lesotho       | Sub-Saharan<br>Africa                               | 0.39   | 6.90  | 0.28   | 4.82  | 0.11  | 1.85 | 0.01  | 0.23 |

|                                |                                               |       |       |       |      |       |      |       |      |
|--------------------------------|-----------------------------------------------|-------|-------|-------|------|-------|------|-------|------|
| Liberia                        | Sub-Saharan Africa                            | 0.32  | 4.59  | 0.23  | 3.22 | 0.08  | 1.14 | 0.02  | 0.23 |
| Libya                          | North Africa & Middle East                    | 2.34  | 2.27  | 0.70  | 0.68 | 1.49  | 1.45 | 0.14  | 0.13 |
| Lithuania                      | Central Europe, Eastern Europe & Central Asia | 3.24  | 3.13  | 0.62  | 0.60 | 2.34  | 2.26 | 0.28  | 0.27 |
| Luxembourg                     | High Income                                   | 0.41  | 0.57  | 0.14  | 0.19 | 0.22  | 0.30 | 0.05  | 0.08 |
| Madagascar                     | Sub-Saharan Africa                            | 3.96  | 9.08  | 2.94  | 6.73 | 0.75  | 1.72 | 0.27  | 0.63 |
| Malawi                         | Sub-Saharan Africa                            | 1.04  | 5.16  | 0.67  | 3.31 | 0.31  | 1.55 | 0.06  | 0.31 |
| Malaysia                       | Southeast Asia, East Asia, & Oceania          | 19.82 | 2.19  | 11.31 | 1.25 | 7.03  | 0.78 | 1.48  | 0.16 |
| Maldives                       | Southeast Asia, East Asia, & Oceania          | 0.14  | 1.31  | 0.08  | 0.74 | 0.05  | 0.45 | 0.01  | 0.13 |
| Mali                           | Sub-Saharan Africa                            | 1.94  | 4.25  | 1.41  | 3.08 | 0.44  | 0.96 | 0.10  | 0.21 |
| Malta                          | High Income                                   | 0.22  | 1.01  | 0.07  | 0.32 | 0.13  | 0.59 | 0.02  | 0.10 |
| Mauritania                     | Sub-Saharan Africa                            | 0.49  | 2.10  | 0.31  | 1.31 | 0.16  | 0.70 | 0.02  | 0.09 |
| Mauritius                      | Southeast Asia, East Asia, & Oceania          | 0.83  | 2.88  | 0.39  | 1.35 | 0.33  | 1.15 | 0.11  | 0.38 |
| Mexico                         | Latin America & Caribbean                     | 27.20 | 1.08  | 11.06 | 0.44 | 10.85 | 0.43 | 5.30  | 0.21 |
| Federated States of Micronesia | Southeast Asia, East Asia, & Oceania          | 0.04  | 10.29 | 0.03  | 7.35 | 0.007 | 1.79 | 0.005 | 1.15 |
| Mongolia                       | Central Europe, Eastern Europe & Central Asia | 3.02  | 7.60  | 2.49  | 6.27 | 0.31  | 0.77 | 0.22  | 0.56 |
| Montenegro                     | Central Europe, Eastern Europe & Central Asia | 0.92  | 6.88  | 0.70  | 5.24 | 0.19  | 1.45 | 0.02  | 0.19 |
| Morocco                        | North Africa & Middle East                    | 12.17 | 4.36  | 3.64  | 1.30 | 7.84  | 2.81 | 0.70  | 0.25 |
| Mozambique                     | Sub-Saharan Africa                            | 2.78  | 7.15  | 1.87  | 4.81 | 0.78  | 2.02 | 0.13  | 0.33 |
| Myanmar                        | Southeast Asia, East Asia, & Oceania          | 27.25 | 9.92  | 17.77 | 6.47 | 7.61  | 2.77 | 1.87  | 0.68 |
| Namibia                        | Sub-Saharan Africa                            | 0.61  | 2.53  | 0.35  | 1.45 | 0.24  | 1.00 | 0.02  | 0.08 |
| Nepal                          | South Asia                                    | 3.84  | 3.91  | 2.15  | 2.19 | 1.17  | 1.19 | 0.52  | 0.53 |
| Netherlands                    | High Income                                   | 9.80  | 1.00  | 2.69  | 0.27 | 5.75  | 0.58 | 1.36  | 0.14 |
| New Zealand                    | High Income                                   | 1.90  | 0.89  | 0.47  | 0.22 | 1.04  | 0.48 | 0.39  | 0.18 |
| Nicaragua                      | Latin America & Caribbean                     | 0.62  | 1.73  | 0.28  | 0.78 | 0.24  | 0.69 | 0.09  | 0.26 |
| Niger                          | Sub-Saharan Africa                            | 1.33  | 4.65  | 0.97  | 3.39 | 0.29  | 1.00 | 0.07  | 0.25 |
| Nigeria                        | Sub-Saharan Africa                            | 21.87 | 2.12  | 14.28 | 1.38 | 6.76  | 0.66 | 0.83  | 0.08 |
| Republic of North Macedonia    | Central Europe, Eastern Europe & Central Asia | 3.12  | 9.03  | 0.93  | 2.70 | 1.92  | 5.54 | 0.27  | 0.79 |
| Norway                         | High Income                                   | 2.93  | 0.85  | 0.66  | 0.19 | 1.76  | 0.51 | 0.50  | 0.15 |
| Oman                           | North Africa & Middle East                    | 1.24  | 0.91  | 0.46  | 0.34 | 0.66  | 0.49 | 0.12  | 0.09 |
| Pakistan                       | South Asia                                    | 40.87 | 4.02  | 24.12 | 2.37 | 11.17 | 1.10 | 5.58  | 0.55 |
| Panama                         | Latin America & Caribbean                     | 1.37  | 1.03  | 0.59  | 0.44 | 0.52  | 0.39 | 0.26  | 0.20 |

|                                  |                                               |        |       |       |       |        |      |       |      |
|----------------------------------|-----------------------------------------------|--------|-------|-------|-------|--------|------|-------|------|
| Papua New Guinea                 | Southeast Asia, East Asia, & Oceania          | 2.46   | 6.45  | 1.75  | 4.59  | 0.35   | 0.91 | 0.36  | 0.94 |
| Paraguay                         | Latin America & Caribbean                     | 1.78   | 2.01  | 0.82  | 0.92  | 0.64   | 0.72 | 0.33  | 0.37 |
| Peru                             | Latin America & Caribbean                     | 5.27   | 1.26  | 2.31  | 0.55  | 1.76   | 0.42 | 1.20  | 0.29 |
| Philippines                      | Southeast Asia, East Asia, & Oceania          | 42.29  | 4.39  | 28.05 | 2.91  | 10.85  | 1.13 | 3.38  | 0.35 |
| Poland                           | Central Europe, Eastern Europe & Central Asia | 31.30  | 2.49  | 8.78  | 0.70  | 19.09  | 1.52 | 3.43  | 0.27 |
| Portugal                         | High Income                                   | 8.69   | 2.42  | 2.86  | 0.80  | 5.04   | 1.40 | 0.80  | 0.22 |
| Puerto Rico                      | Latin America & Caribbean                     | 1.31   | 1.18  | 0.53  | 0.47  | 0.61   | 0.55 | 0.17  | 0.16 |
| Qatar                            | North Africa & Middle East                    | 0.86   | 0.34  | 0.35  | 0.14  | 0.34   | 0.13 | 0.17  | 0.07 |
| Moldova                          | Central Europe, Eastern Europe & Central Asia | 2.56   | 7.38  | 1.04  | 3.01  | 1.38   | 3.98 | 0.14  | 0.39 |
| Romania                          | Central Europe, Eastern Europe & Central Asia | 30.55  | 5.28  | 9.57  | 1.65  | 18.11  | 3.13 | 2.87  | 0.50 |
| Russia                           | Central Europe, Eastern Europe & Central Asia | 202.46 | 5.07  | 52.88 | 1.32  | 131.61 | 3.30 | 17.97 | 0.45 |
| Rwanda                           | Sub-Saharan Africa                            | 1.25   | 4.43  | 0.90  | 3.19  | 0.27   | 0.96 | 0.08  | 0.28 |
| Saint Lucia                      | Latin America & Caribbean                     | 0.09   | 3.18  | 0.04  | 1.55  | 0.04   | 1.31 | 0.009 | 0.33 |
| Saint Vincent and the Grenadines | Latin America & Caribbean                     | 0.05   | 3.72  | 0.03  | 1.93  | 0.02   | 1.49 | 0.004 | 0.30 |
| Samoa                            | Southeast Asia, East Asia, & Oceania          | 0.09   | 6.64  | 0.06  | 4.41  | 0.02   | 1.51 | 0.009 | 0.73 |
| São Tomé and Príncipe            | Sub-Saharan Africa                            | 0.04   | 4.31  | 0.02  | 2.84  | 0.01   | 1.30 | 0.001 | 0.16 |
| Saudi Arabia                     | North Africa & Middle East                    | 25.32  | 1.57  | 12.44 | 0.77  | 11.67  | 0.73 | 1.21  | 0.08 |
| Senegal                          | Sub-Saharan Africa                            | 1.78   | 3.26  | 1.21  | 2.21  | 0.50   | 0.91 | 0.08  | 0.14 |
| Serbia                           | Central Europe, Eastern Europe & Central Asia | 11.07  | 8.72  | 2.35  | 1.85  | 7.84   | 6.17 | 0.89  | 0.70 |
| Seychelles                       | Southeast Asia, East Asia, & Oceania          | 0.07   | 2.61  | 0.04  | 1.46  | 0.03   | 1.00 | 0.004 | 0.16 |
| Sierra Leone                     | Sub-Saharan Africa                            | 0.78   | 5.80  | 0.54  | 4.01  | 0.21   | 1.54 | 0.03  | 0.25 |
| Singapore                        | High Income                                   | 3.24   | 0.58  | 1.20  | 0.21  | 1.49   | 0.27 | 0.55  | 0.10 |
| Slovakia                         | Central Europe, Eastern Europe & Central Asia | 4.30   | 2.47  | 1.14  | 0.66  | 2.81   | 1.61 | 0.35  | 0.20 |
| Slovenia                         | Central Europe, Eastern Europe & Central Asia | 1.32   | 1.63  | 0.35  | 0.43  | 0.83   | 1.02 | 0.15  | 0.18 |
| Solomon Islands                  | Southeast Asia, East Asia, & Oceania          | 0.30   | 16.69 | 0.23  | 12.93 | 0.04   | 2.21 | 0.03  | 1.55 |
| South Africa                     | Sub-Saharan Africa                            | 15.00  | 2.05  | 7.63  | 1.04  | 6.85   | 0.94 | 0.53  | 0.07 |
| Spain                            | High Income                                   | 22.14  | 1.15  | 7.63  | 0.40  | 11.65  | 0.61 | 2.86  | 0.15 |
| Sri Lanka                        | Southeast Asia, East Asia, & Oceania          | 7.61   | 2.67  | 2.71  | 0.95  | 3.95   | 1.39 | 0.95  | 0.33 |

|                      |                                               |        |       |       |      |        |      |       |      |
|----------------------|-----------------------------------------------|--------|-------|-------|------|--------|------|-------|------|
| Sudan                | North Africa & Middle East                    | 6.65   | 3.71  | 2.52  | 1.40 | 3.70   | 2.06 | 0.44  | 0.25 |
| Suriname             | Latin America & Caribbean                     | 0.36   | 3.65  | 0.22  | 2.18 | 0.11   | 1.14 | 0.03  | 0.33 |
| Sweden               | High Income                                   | 5.98   | 1.10  | 1.51  | 0.28 | 3.81   | 0.70 | 0.65  | 0.12 |
| Switzerland          | High Income                                   | 3.92   | 0.67  | 0.90  | 0.15 | 2.37   | 0.40 | 0.65  | 0.11 |
| Tajikistan           | Central Europe, Eastern Europe & Central Asia | 1.65   | 5.21  | 1.32  | 4.18 | 0.26   | 0.81 | 0.07  | 0.22 |
| Thailand             | Southeast Asia, East Asia, & Oceania          | 41.02  | 3.19  | 21.40 | 1.67 | 13.17  | 1.03 | 6.45  | 0.50 |
| Timor-Leste          | Southeast Asia, East Asia, & Oceania          | 0.32   | 7.04  | 0.20  | 4.43 | 0.10   | 2.13 | 0.02  | 0.48 |
| Togo                 | Sub-Saharan Africa                            | 0.70   | 5.41  | 0.49  | 3.81 | 0.18   | 1.37 | 0.03  | 0.22 |
| Tonga                | Southeast Asia, East Asia, & Oceania          | 0.02   | 3.29  | 0.01  | 1.82 | 0.007  | 1.10 | 0.002 | 0.37 |
| Trinidad and Tobago  | Latin America & Caribbean                     | 0.82   | 2.27  | 0.32  | 0.90 | 0.39   | 1.08 | 0.10  | 0.29 |
| Tunisia              | North Africa & Middle East                    | 3.79   | 3.02  | 0.96  | 0.77 | 2.62   | 2.08 | 0.21  | 0.17 |
| Turkey               | North Africa & Middle East                    | 36.79  | 1.56  | 13.80 | 0.59 | 18.88  | 0.80 | 4.11  | 0.17 |
| Turkmenistan         | Central Europe, Eastern Europe & Central Asia | 3.81   | 4.13  | 1.89  | 2.05 | 1.49   | 1.62 | 0.43  | 0.46 |
| Uganda               | Sub-Saharan Africa                            | 2.87   | 2.97  | 1.97  | 2.03 | 0.73   | 0.75 | 0.18  | 0.18 |
| Ukraine              | Central Europe, Eastern Europe & Central Asia | 42.18  | 7.84  | 12.35 | 2.29 | 26.56  | 4.93 | 3.28  | 0.61 |
| United Arab Emirates | North Africa & Middle East                    | 8.13   | 1.24  | 3.13  | 0.48 | 4.44   | 0.68 | 0.56  | 0.09 |
| United Kingdom       | High Income                                   | 33.93  | 1.09  | 9.60  | 0.31 | 18.43  | 0.59 | 5.91  | 0.19 |
| United States        | High Income                                   | 214.61 | 1.04  | 70.55 | 0.34 | 106.67 | 0.52 | 37.39 | 0.18 |
| Uruguay              | High Income                                   | 1.78   | 2.40  | 0.50  | 0.68 | 0.94   | 1.28 | 0.33  | 0.44 |
| Uzbekistan           | Central Europe, Eastern Europe & Central Asia | 12.09  | 5.13  | 6.66  | 2.83 | 4.79   | 2.03 | 0.63  | 0.27 |
| Vanuatu              | Southeast Asia, East Asia, & Oceania          | 0.11   | 11.61 | 0.07  | 8.00 | 0.02   | 2.33 | 0.01  | 1.28 |
| Vietnam              | Southeast Asia, East Asia, & Oceania          | 59.16  | 7.63  | 35.71 | 4.60 | 19.93  | 2.57 | 3.52  | 0.45 |
| Zambia               | Sub-Saharan Africa                            | 2.60   | 4.20  | 1.84  | 2.97 | 0.62   | 1.00 | 0.14  | 0.22 |
| Zimbabwe             | Sub-Saharan Africa                            | 1.39   | 3.39  | 0.63  | 1.54 | 0.58   | 1.42 | 0.18  | 0.43 |

VLW = Value of Lost Welfare, GDP = Gross Domestic Product.

**Supplemental Table 3.** VLW and VLW/GDP in 2019 for stroke overall, ischemic stroke, intracerebral hemorrhage, and subarachnoid hemorrhage, generated using income elasticity (IE) at 1.50. All values are in 2017 USD, PPP.

| IE = 1.50              |                                               | Stroke Overall   |             | Intracerebral Hemorrhage |             | Ischemic Stroke  |             | Subarachnoid Hemorrhage |             |
|------------------------|-----------------------------------------------|------------------|-------------|--------------------------|-------------|------------------|-------------|-------------------------|-------------|
| Country                | Region                                        | VLW (\$ billion) | VLW/GDP (%) | VLW (\$ billion)         | VLW/GDP (%) | VLW (\$ billion) | VLW/GDP (%) | VLW (\$ billion)        | VLW/GDP (%) |
| Afghanistan            | North Africa & Middle East                    | 0.19             | 0.24        | 0.09                     | 0.12        | 0.08             | 0.10        | 0.02                    | 0.02        |
| Albania                | Central Europe, Eastern Europe & Central Asia | 0.48             | 1.24        | 0.33                     | 0.85        | 0.12             | 0.32        | 0.03                    | 0.07        |
| Algeria                | North Africa & Middle East                    | 2.55             | 0.51        | 0.75                     | 0.15        | 1.64             | 0.33        | 0.16                    | 0.03        |
| Angola                 | Sub-Saharan Africa                            | 0.54             | 0.25        | 0.36                     | 0.17        | 0.15             | 0.07        | 0.03                    | 0.01        |
| Antigua and Barbuda    | Latin America & Caribbean                     | 0.02             | 0.74        | 0.008                    | 0.38        | 0.006            | 0.26        | 0.002                   | 0.10        |
| Argentina              | High Income                                   | 6.48             | 0.65        | 3.13                     | 0.32        | 2.22             | 0.22        | 1.13                    | 0.11        |
| Armenia                | Central Europe, Eastern Europe & Central Asia | 0.29             | 0.71        | 0.09                     | 0.22        | 0.17             | 0.41        | 0.03                    | 0.07        |
| Australia              | High Income                                   | 7.33             | 0.58        | 1.97                     | 0.16        | 4.13             | 0.33        | 1.23                    | 0.10        |
| Austria                | High Income                                   | 3.91             | 0.79        | 0.99                     | 0.20        | 2.28             | 0.46        | 0.64                    | 0.13        |
| Azerbaijan             | Central Europe, Eastern Europe & Central Asia | 1.48             | 1.02        | 0.97                     | 0.67        | 0.45             | 0.31        | 0.05                    | 0.04        |
| Bahamas                | Latin America & Caribbean                     | 0.15             | 1.01        | 0.08                     | 0.58        | 0.04             | 0.31        | 0.02                    | 0.13        |
| Bahrain                | North Africa & Middle East                    | 0.33             | 0.45        | 0.13                     | 0.18        | 0.16             | 0.21        | 0.04                    | 0.06        |
| Bangladesh             | South Asia                                    | 4.21             | 0.54        | 2.41                     | 0.31        | 1.13             | 0.15        | 0.68                    | 0.09        |
| Barbados               | Latin America & Caribbean                     | 0.04             | 0.92        | 0.02                     | 0.37        | 0.02             | 0.44        | 0.005                   | 0.11        |
| Belarus                | Central Europe, Eastern Europe & Central Asia | 3.02             | 1.66        | 0.88                     | 0.48        | 1.86             | 1.02        | 0.28                    | 0.16        |
| Belgium                | High Income                                   | 5.45             | 0.92        | 1.80                     | 0.30        | 2.92             | 0.49        | 0.73                    | 0.12        |
| Belize                 | Latin America & Caribbean                     | 0.008            | 0.28        | 0.005                    | 0.16        | 0.002            | 0.08        | 0.001                   | 0.04        |
| Benin                  | Sub-Saharan Africa                            | 0.08             | 0.21        | 0.06                     | 0.15        | 0.02             | 0.05        | 0.004                   | 0.009       |
| Bermuda                | Latin America & Caribbean                     | 0.07             | 1.25        | 0.02                     | 0.42        | 0.03             | 0.67        | 0.009                   | 0.17        |
| Bhutan                 | South Asia                                    | 0.03             | 0.38        | 0.02                     | 0.20        | 0.01             | 0.13        | 0.005                   | 0.05        |
| Bolivia                | Latin America & Caribbean                     | 0.38             | 0.38        | 0.17                     | 0.17        | 0.11             | 0.11        | 0.10                    | 0.10        |
| Bosnia and Herzegovina | Central Europe, Eastern Europe & Central Asia | 0.80             | 1.63        | 0.13                     | 0.27        | 0.61             | 1.25        | 0.06                    | 0.12        |
| Botswana               | Sub-Saharan Africa                            | 0.30             | 0.73        | 0.18                     | 0.45        | 0.11             | 0.26        | 0.01                    | 0.02        |
| Brazil                 | Latin America & Caribbean                     | 19.59            | 0.63        | 8.42                     | 0.27        | 7.54             | 0.24        | 3.63                    | 0.12        |
| Brunei                 | High Income                                   | 0.26             | 0.96        | 0.11                     | 0.41        | 0.09             | 0.32        | 0.06                    | 0.22        |
| Bulgaria               | Central Europe, Eastern Europe & Central Asia | 5.71             | 3.53        | 1.84                     | 1.13        | 3.58             | 2.21        | 0.29                    | 0.18        |
| Burkina Faso           | Sub-Saharan Africa                            | 0.08             | 0.17        | 0.06                     | 0.13        | 0.01             | 0.03        | 0.003                   | 0.008       |
| Burundi                | Sub-Saharan Africa                            | 0.010            | 0.11        | 0.007                    | 0.08        | 0.002            | 0.02        | 0.001                   | 0.007       |

|                                  |                                               |        |      |        |      |        |      |       |       |
|----------------------------------|-----------------------------------------------|--------|------|--------|------|--------|------|-------|-------|
| Cape Verde                       | Sub-Saharan Africa                            | 0.02   | 0.40 | 0.01   | 0.27 | 0.005  | 0.13 | 0.000 | 0.01  |
| Cambodia                         | Southeast Asia, East Asia, & Oceania          | 0.37   | 0.51 | 0.24   | 0.34 | 0.10   | 0.13 | 0.03  | 0.04  |
| Cameroon                         | Sub-Saharan Africa                            | 0.24   | 0.26 | 0.18   | 0.19 | 0.05   | 0.06 | 0.010 | 0.01  |
| Canada                           | High Income                                   | 12.61  | 0.68 | 3.19   | 0.17 | 7.25   | 0.39 | 2.18  | 0.12  |
| Central African Republic         | Sub-Saharan Africa                            | 0.008  | 0.19 | 0.006  | 0.14 | 0.002  | 0.04 | 0.000 | 0.009 |
| Chad                             | Sub-Saharan Africa                            | 0.04   | 0.14 | 0.03   | 0.10 | 0.008  | 0.03 | 0.002 | 0.006 |
| Chile                            | High Income                                   | 2.94   | 0.62 | 1.10   | 0.23 | 1.32   | 0.28 | 0.51  | 0.11  |
| China                            | Southeast Asia, East Asia, & Oceania          | 337.64 | 1.50 | 171.66 | 0.76 | 146.75 | 0.65 | 19.23 | 0.09  |
| Colombia                         | Latin America & Caribbean                     | 2.32   | 0.32 | 0.80   | 0.11 | 0.81   | 0.11 | 0.71  | 0.10  |
| Comoros                          | Sub-Saharan Africa                            | 0.006  | 0.24 | 0.004  | 0.15 | 0.002  | 0.08 | 0.000 | 0.01  |
| Congo                            | Sub-Saharan Africa                            | 0.06   | 0.29 | 0.04   | 0.19 | 0.02   | 0.08 | 0.003 | 0.01  |
| Costa Rica                       | Latin America & Caribbean                     | 0.32   | 0.31 | 0.12   | 0.12 | 0.13   | 0.13 | 0.07  | 0.07  |
| Croatia                          | Central Europe, Eastern Europe & Central Asia | 1.99   | 1.70 | 0.54   | 0.46 | 1.26   | 1.08 | 0.19  | 0.16  |
| Cyprus                           | High Income                                   | 0.34   | 0.95 | 0.11   | 0.32 | 0.17   | 0.49 | 0.05  | 0.14  |
| Czech Republic                   | Central Europe, Eastern Europe & Central Asia | 5.47   | 1.25 | 1.12   | 0.26 | 3.75   | 0.86 | 0.60  | 0.14  |
| Democratic Republic of the Congo | Sub-Saharan Africa                            | 0.11   | 0.12 | 0.08   | 0.08 | 0.03   | 0.03 | 0.007 | 0.007 |
| Denmark                          | High Income                                   | 3.29   | 0.99 | 0.95   | 0.29 | 1.85   | 0.56 | 0.49  | 0.15  |
| Djibouti                         | Sub-Saharan Africa                            | 0.02   | 0.40 | 0.01   | 0.25 | 0.006  | 0.12 | 0.001 | 0.03  |
| Dominican Republic               | Latin America & Caribbean                     | 1.81   | 0.91 | 1.03   | 0.52 | 0.58   | 0.30 | 0.19  | 0.10  |
| Ecuador                          | Latin America & Caribbean                     | 0.69   | 0.35 | 0.27   | 0.14 | 0.23   | 0.12 | 0.19  | 0.10  |
| Egypt                            | North Africa & Middle East                    | 6.99   | 0.59 | 2.57   | 0.22 | 3.93   | 0.33 | 0.49  | 0.04  |
| El Salvador                      | Latin America & Caribbean                     | 0.14   | 0.24 | 0.06   | 0.11 | 0.05   | 0.08 | 0.03  | 0.05  |
| Equatorial Guinea                | Sub-Saharan Africa                            | 0.08   | 0.31 | 0.05   | 0.19 | 0.03   | 0.11 | 0.003 | 0.01  |
| Estonia                          | Central Europe, Eastern Europe & Central Asia | 0.51   | 1.05 | 0.11   | 0.22 | 0.34   | 0.70 | 0.06  | 0.13  |
| Eswatini                         | Sub-Saharan Africa                            | 0.04   | 0.42 | 0.03   | 0.27 | 0.01   | 0.14 | 0.001 | 0.01  |
| Ethiopia                         | Sub-Saharan Africa                            | 0.29   | 0.12 | 0.20   | 0.08 | 0.07   | 0.03 | 0.02  | 0.009 |
| Fiji                             | Southeast Asia, East Asia, & Oceania          | 0.11   | 0.87 | 0.05   | 0.45 | 0.03   | 0.27 | 0.02  | 0.15  |
| Finland                          | High Income                                   | 3.01   | 1.12 | 0.73   | 0.27 | 1.84   | 0.69 | 0.44  | 0.17  |
| France                           | High Income                                   | 21.98  | 0.71 | 6.46   | 0.21 | 12.11  | 0.39 | 3.41  | 0.11  |
| Gabon                            | Sub-Saharan Africa                            | 0.14   | 0.42 | 0.08   | 0.26 | 0.05   | 0.15 | 0.006 | 0.02  |
| Gambia                           | Sub-Saharan Africa                            | 0.009  | 0.18 | 0.006  | 0.12 | 0.003  | 0.05 | 0.000 | 0.007 |

|               |                                                     |        |      |       |      |       |      |       |       |
|---------------|-----------------------------------------------------|--------|------|-------|------|-------|------|-------|-------|
| Georgia       | Central Europe,<br>Eastern Europe<br>& Central Asia | 1.14   | 2.05 | 0.57  | 1.03 | 0.44  | 0.78 | 0.14  | 0.24  |
| Germany       | High Income                                         | 47.06  | 1.05 | 11.29 | 0.25 | 30.11 | 0.67 | 5.66  | 0.13  |
| Ghana         | Sub-Saharan<br>Africa                               | 0.65   | 0.40 | 0.40  | 0.24 | 0.23  | 0.14 | 0.02  | 0.02  |
| Greece        | High Income                                         | 4.48   | 1.41 | 1.75  | 0.55 | 2.42  | 0.76 | 0.32  | 0.10  |
| Grenada       | Latin America &<br>Caribbean                        | 0.02   | 0.81 | 0.007 | 0.37 | 0.007 | 0.35 | 0.002 | 0.09  |
| Guatemala     | Latin America &<br>Caribbean                        | 0.37   | 0.26 | 0.21  | 0.15 | 0.09  | 0.07 | 0.06  | 0.05  |
| Guinea        | Sub-Saharan<br>Africa                               | 0.07   | 0.22 | 0.05  | 0.16 | 0.02  | 0.05 | 0.003 | 0.010 |
| Guinea-Bissau | Sub-Saharan<br>Africa                               | 0.008  | 0.22 | 0.006 | 0.16 | 0.002 | 0.05 | 0.000 | 0.009 |
| Guyana        | Latin America &<br>Caribbean                        | 0.11   | 1.08 | 0.06  | 0.61 | 0.04  | 0.36 | 0.01  | 0.10  |
| Haiti         | Latin America &<br>Caribbean                        | 0.15   | 0.47 | 0.09  | 0.27 | 0.04  | 0.12 | 0.02  | 0.08  |
| Honduras      | Latin America &<br>Caribbean                        | 0.21   | 0.37 | 0.10  | 0.18 | 0.07  | 0.12 | 0.04  | 0.08  |
| Hungary       | Central Europe,<br>Eastern Europe<br>& Central Asia | 4.84   | 1.52 | 1.13  | 0.35 | 3.28  | 1.03 | 0.43  | 0.14  |
| Iceland       | High Income                                         | 0.11   | 0.53 | 0.03  | 0.14 | 0.06  | 0.30 | 0.02  | 0.09  |
| India         | South Asia                                          | 34.30  | 0.37 | 19.90 | 0.22 | 10.35 | 0.11 | 4.04  | 0.04  |
| Indonesia     | Southeast Asia,<br>East Asia, &<br>Oceania          | 40.007 | 1.25 | 24.61 | 0.77 | 12.78 | 0.40 | 2.61  | 0.08  |
| Iran          | North Africa &<br>Middle East                       | 4.57   | 0.45 | 0.99  | 0.10 | 3.32  | 0.32 | 0.26  | 0.03  |
| Iraq          | North Africa &<br>Middle East                       | 2.88   | 0.68 | 1.32  | 0.31 | 1.44  | 0.34 | 0.11  | 0.03  |
| Ireland       | High Income                                         | 3.34   | 0.78 | 0.82  | 0.19 | 1.82  | 0.42 | 0.71  | 0.17  |
| Israel        | High Income                                         | 1.58   | 0.44 | 0.60  | 0.17 | 0.79  | 0.22 | 0.19  | 0.05  |
| Italy         | High Income                                         | 25.85  | 1.01 | 8.39  | 0.33 | 14.72 | 0.58 | 2.75  | 0.11  |
| Jamaica       | Latin America &<br>Caribbean                        | 0.18   | 0.63 | 0.09  | 0.31 | 0.07  | 0.24 | 0.02  | 0.08  |
| Japan         | High Income                                         | 74.68  | 1.43 | 21.66 | 0.41 | 37.49 | 0.72 | 15.52 | 0.30  |
| Jordan        | North Africa &<br>Middle East                       | 0.32   | 0.32 | 0.09  | 0.09 | 0.21  | 0.21 | 0.02  | 0.02  |
| Kazakhstan    | Central Europe,<br>Eastern Europe<br>& Central Asia | 7.97   | 1.63 | 3.50  | 0.72 | 3.75  | 0.77 | 0.71  | 0.15  |
| Kenya         | Sub-Saharan<br>Africa                               | 0.50   | 0.22 | 0.35  | 0.15 | 0.13  | 0.06 | 0.03  | 0.01  |
| Kiribati      | Southeast Asia,<br>East Asia, &<br>Oceania          | 0.002  | 0.84 | 0.002 | 0.59 | 0.000 | 0.14 | 0.000 | 0.11  |
| Kuwait        | North Africa &<br>Middle East                       | 1.21   | 0.58 | 0.44  | 0.21 | 0.67  | 0.32 | 0.10  | 0.05  |
| Kyrgyzstan    | Central Europe,<br>Eastern Europe<br>& Central Asia | 0.17   | 0.49 | 0.08  | 0.22 | 0.07  | 0.21 | 0.02  | 0.06  |
| Laos          | Southeast Asia,<br>East Asia, &<br>Oceania          | 0.43   | 0.76 | 0.29  | 0.51 | 0.11  | 0.19 | 0.03  | 0.06  |
| Latvia        | Central Europe,<br>Eastern Europe<br>& Central Asia | 1.36   | 2.30 | 0.26  | 0.43 | 1.01  | 1.72 | 0.09  | 0.15  |
| Lebanon       | North Africa &<br>Middle East                       | 0.25   | 0.25 | 0.05  | 0.05 | 0.19  | 0.19 | 0.01  | 0.01  |
| Lesotho       | Sub-Saharan<br>Africa                               | 0.02   | 0.35 | 0.01  | 0.24 | 0.005 | 0.09 | 0.001 | 0.01  |



|                                |                                               |       |      |       |      |       |      |       |       |
|--------------------------------|-----------------------------------------------|-------|------|-------|------|-------|------|-------|-------|
| Liberia                        | Sub-Saharan Africa                            | 0.009 | 0.13 | 0.006 | 0.09 | 0.002 | 0.03 | 0.000 | 0.006 |
| Libya                          | North Africa & Middle East                    | 0.61  | 0.59 | 0.18  | 0.18 | 0.39  | 0.38 | 0.04  | 0.03  |
| Lithuania                      | Central Europe, Eastern Europe & Central Asia | 1.97  | 1.91 | 0.38  | 0.37 | 1.42  | 1.38 | 0.17  | 0.17  |
| Luxembourg                     | High Income                                   | 0.72  | 1.01 | 0.24  | 0.34 | 0.38  | 0.54 | 0.10  | 0.14  |
| Madagascar                     | Sub-Saharan Africa                            | 0.12  | 0.28 | 0.09  | 0.21 | 0.02  | 0.05 | 0.009 | 0.02  |
| Malawi                         | Sub-Saharan Africa                            | 0.02  | 0.11 | 0.01  | 0.07 | 0.007 | 0.03 | 0.001 | 0.007 |
| Malaysia                       | Southeast Asia, East Asia, & Oceania          | 9.35  | 1.03 | 5.34  | 0.59 | 3.32  | 0.37 | 0.70  | 0.08  |
| Maldives                       | Southeast Asia, East Asia, & Oceania          | 0.05  | 0.43 | 0.03  | 0.24 | 0.02  | 0.15 | 0.004 | 0.04  |
| Mali                           | Sub-Saharan Africa                            | 0.08  | 0.19 | 0.06  | 0.13 | 0.02  | 0.04 | 0.004 | 0.009 |
| Malta                          | High Income                                   | 0.16  | 0.72 | 0.05  | 0.23 | 0.09  | 0.42 | 0.02  | 0.07  |
| Mauritania                     | Sub-Saharan Africa                            | 0.05  | 0.20 | 0.03  | 0.12 | 0.02  | 0.07 | 0.002 | 0.008 |
| Mauritius                      | Southeast Asia, East Asia, & Oceania          | 0.32  | 1.11 | 0.15  | 0.52 | 0.13  | 0.44 | 0.04  | 0.14  |
| Mexico                         | Latin America & Caribbean                     | 9.08  | 0.36 | 3.69  | 0.15 | 3.62  | 0.14 | 1.77  | 0.07  |
| Federated States of Micronesia | Southeast Asia, East Asia, & Oceania          | 0.003 | 0.66 | 0.002 | 0.47 | 0.000 | 0.11 | 0.000 | 0.07  |
| Mongolia                       | Central Europe, Eastern Europe & Central Asia | 0.64  | 1.62 | 0.53  | 1.34 | 0.07  | 0.16 | 0.05  | 0.12  |
| Montenegro                     | Central Europe, Eastern Europe & Central Asia | 0.33  | 2.50 | 0.26  | 1.90 | 0.07  | 0.53 | 0.009 | 0.07  |
| Morocco                        | North Africa & Middle East                    | 1.63  | 0.58 | 0.49  | 0.17 | 1.05  | 0.38 | 0.09  | 0.03  |
| Mozambique                     | Sub-Saharan Africa                            | 0.07  | 0.18 | 0.05  | 0.12 | 0.02  | 0.05 | 0.003 | 0.008 |
| Myanmar                        | Southeast Asia, East Asia, & Oceania          | 2.51  | 0.91 | 1.64  | 0.60 | 0.70  | 0.26 | 0.17  | 0.06  |
| Namibia                        | Sub-Saharan Africa                            | 0.10  | 0.43 | 0.06  | 0.25 | 0.04  | 0.17 | 0.004 | 0.01  |
| Nepal                          | South Asia                                    | 0.24  | 0.25 | 0.14  | 0.14 | 0.07  | 0.08 | 0.03  | 0.03  |
| Netherlands                    | High Income                                   | 8.94  | 0.91 | 2.46  | 0.25 | 5.24  | 0.53 | 1.24  | 0.13  |
| New Zealand                    | High Income                                   | 1.32  | 0.62 | 0.33  | 0.16 | 0.72  | 0.34 | 0.27  | 0.13  |
| Nicaragua                      | Latin America & Caribbean                     | 0.06  | 0.17 | 0.03  | 0.08 | 0.02  | 0.07 | 0.009 | 0.03  |
| Niger                          | Sub-Saharan Africa                            | 0.03  | 0.11 | 0.02  | 0.08 | 0.007 | 0.02 | 0.002 | 0.006 |
| Nigeria                        | Sub-Saharan Africa                            | 2.03  | 0.20 | 1.33  | 0.13 | 0.63  | 0.06 | 0.08  | 0.007 |
| Republic of North Macedonia    | Central Europe, Eastern Europe & Central Asia | 0.89  | 2.56 | 0.26  | 0.77 | 0.54  | 1.57 | 0.08  | 0.22  |
| Norway                         | High Income                                   | 3.02  | 0.88 | 0.68  | 0.20 | 1.81  | 0.53 | 0.52  | 0.15  |
| Oman                           | North Africa & Middle East                    | 0.56  | 0.41 | 0.21  | 0.15 | 0.30  | 0.22 | 0.05  | 0.04  |
| Pakistan                       | South Asia                                    | 3.49  | 0.34 | 2.06  | 0.20 | 0.95  | 0.09 | 0.48  | 0.05  |
| Panama                         | Latin America & Caribbean                     | 0.71  | 0.53 | 0.31  | 0.23 | 0.27  | 0.20 | 0.14  | 0.10  |

|                                  |                                               |       |      |       |      |       |      |       |       |
|----------------------------------|-----------------------------------------------|-------|------|-------|------|-------|------|-------|-------|
| Papua New Guinea                 | Southeast Asia, East Asia, & Oceania          | 0.20  | 0.51 | 0.14  | 0.36 | 0.03  | 0.07 | 0.03  | 0.07  |
| Paraguay                         | Latin America & Caribbean                     | 0.39  | 0.44 | 0.18  | 0.20 | 0.14  | 0.16 | 0.07  | 0.08  |
| Peru                             | Latin America & Caribbean                     | 1.17  | 0.28 | 0.51  | 0.12 | 0.39  | 0.09 | 0.27  | 0.06  |
| Philippines                      | Southeast Asia, East Asia, & Oceania          | 6.64  | 0.69 | 4.41  | 0.46 | 1.70  | 0.18 | 0.53  | 0.06  |
| Poland                           | Central Europe, Eastern Europe & Central Asia | 17.11 | 1.36 | 4.80  | 0.38 | 10.44 | 0.83 | 1.87  | 0.15  |
| Portugal                         | High Income                                   | 4.99  | 1.39 | 1.64  | 0.46 | 2.89  | 0.81 | 0.46  | 0.13  |
| Puerto Rico                      | Latin America & Caribbean                     | 0.75  | 0.68 | 0.30  | 0.27 | 0.35  | 0.32 | 0.10  | 0.09  |
| Qatar                            | North Africa & Middle East                    | 1.21  | 0.48 | 0.49  | 0.19 | 0.48  | 0.19 | 0.25  | 0.10  |
| Moldova                          | Central Europe, Eastern Europe & Central Asia | 0.58  | 1.66 | 0.23  | 0.68 | 0.31  | 0.90 | 0.03  | 0.09  |
| Romania                          | Central Europe, Eastern Europe & Central Asia | 15.13 | 2.62 | 4.74  | 0.82 | 8.97  | 1.55 | 1.42  | 0.25  |
| Russia                           | Central Europe, Eastern Europe & Central Asia | 91.81 | 2.30 | 23.98 | 0.60 | 59.68 | 1.49 | 8.15  | 0.20  |
| Rwanda                           | Sub-Saharan Africa                            | 0.05  | 0.19 | 0.04  | 0.13 | 0.01  | 0.04 | 0.003 | 0.01  |
| Saint Lucia                      | Latin America & Caribbean                     | 0.02  | 0.84 | 0.01  | 0.41 | 0.010 | 0.35 | 0.002 | 0.09  |
| Saint Vincent and the Grenadines | Latin America & Caribbean                     | 0.01  | 0.81 | 0.006 | 0.42 | 0.004 | 0.32 | 0.001 | 0.06  |
| Samoa                            | Southeast Asia, East Asia, & Oceania          | 0.010 | 0.78 | 0.007 | 0.51 | 0.002 | 0.18 | 0.001 | 0.08  |
| São Tomé and Príncipe            | Sub-Saharan Africa                            | 0.003 | 0.32 | 0.002 | 0.21 | 0.001 | 0.10 | 0.000 | 0.01  |
| Saudi Arabia                     | North Africa & Middle East                    | 19.29 | 1.20 | 9.48  | 0.59 | 8.89  | 0.55 | 0.92  | 0.06  |
| Senegal                          | Sub-Saharan Africa                            | 0.11  | 0.20 | 0.08  | 0.14 | 0.03  | 0.06 | 0.005 | 0.009 |
| Serbia                           | Central Europe, Eastern Europe & Central Asia | 3.44  | 2.71 | 0.73  | 0.57 | 2.44  | 1.92 | 0.28  | 0.22  |
| Seychelles                       | Southeast Asia, East Asia, & Oceania          | 0.03  | 1.20 | 0.02  | 0.67 | 0.01  | 0.46 | 0.002 | 0.07  |
| Sierra Leone                     | Sub-Saharan Africa                            | 0.03  | 0.19 | 0.02  | 0.13 | 0.007 | 0.05 | 0.001 | 0.008 |
| Singapore                        | High Income                                   | 4.97  | 0.89 | 1.84  | 0.33 | 2.28  | 0.41 | 0.85  | 0.15  |
| Slovakia                         | Central Europe, Eastern Europe & Central Asia | 2.27  | 1.30 | 0.60  | 0.35 | 1.48  | 0.85 | 0.19  | 0.11  |
| Slovenia                         | Central Europe, Eastern Europe & Central Asia | 0.84  | 1.04 | 0.22  | 0.27 | 0.53  | 0.65 | 0.09  | 0.11  |
| Solomon Islands                  | Southeast Asia, East Asia, & Oceania          | 0.01  | 0.83 | 0.01  | 0.64 | 0.002 | 0.11 | 0.001 | 0.08  |
| South Africa                     | Sub-Saharan Africa                            | 3.25  | 0.44 | 1.65  | 0.23 | 1.48  | 0.20 | 0.12  | 0.02  |
| Spain                            | High Income                                   | 14.76 | 0.77 | 5.08  | 0.26 | 7.76  | 0.40 | 1.91  | 0.10  |
| Sri Lanka                        | Southeast Asia, East Asia, & Oceania          | 1.72  | 0.60 | 0.61  | 0.22 | 0.89  | 0.31 | 0.21  | 0.08  |

|                      |                                               |        |      |       |      |        |      |       |       |
|----------------------|-----------------------------------------------|--------|------|-------|------|--------|------|-------|-------|
| Sudan                | North Africa & Middle East                    | 0.51   | 0.28 | 0.19  | 0.11 | 0.28   | 0.16 | 0.03  | 0.02  |
| Suriname             | Latin America & Caribbean                     | 0.11   | 1.06 | 0.06  | 0.63 | 0.03   | 0.33 | 0.010 | 0.10  |
| Sweden               | High Income                                   | 5.09   | 0.94 | 1.28  | 0.24 | 3.25   | 0.60 | 0.56  | 0.10  |
| Switzerland          | High Income                                   | 4.27   | 0.73 | 0.98  | 0.17 | 2.58   | 0.44 | 0.71  | 0.12  |
| Tajikistan           | Central Europe, Eastern Europe & Central Asia | 0.10   | 0.33 | 0.08  | 0.26 | 0.02   | 0.05 | 0.004 | 0.01  |
| Thailand             | Southeast Asia, East Asia, & Oceania          | 12.86  | 1.00 | 6.71  | 0.52 | 4.13   | 0.32 | 2.02  | 0.16  |
| Timor-Leste          | Southeast Asia, East Asia, & Oceania          | 0.02   | 0.46 | 0.01  | 0.29 | 0.006  | 0.14 | 0.001 | 0.03  |
| Togo                 | Sub-Saharan Africa                            | 0.02   | 0.17 | 0.02  | 0.12 | 0.005  | 0.04 | 0.001 | 0.007 |
| Tonga                | Southeast Asia, East Asia, & Oceania          | 0.003  | 0.38 | 0.001 | 0.21 | 0.001  | 0.13 | 0.000 | 0.04  |
| Trinidad and Tobago  | Latin America & Caribbean                     | 0.36   | 0.98 | 0.14  | 0.39 | 0.17   | 0.47 | 0.05  | 0.12  |
| Tunisia              | North Africa & Middle East                    | 0.71   | 0.57 | 0.18  | 0.14 | 0.49   | 0.39 | 0.04  | 0.03  |
| Turkey               | North Africa & Middle East                    | 17.26  | 0.73 | 6.48  | 0.28 | 8.86   | 0.38 | 1.93  | 0.08  |
| Turkmenistan         | Central Europe, Eastern Europe & Central Asia | 1.01   | 1.10 | 0.50  | 0.55 | 0.40   | 0.43 | 0.11  | 0.12  |
| Uganda               | Sub-Saharan Africa                            | 0.12   | 0.12 | 0.08  | 0.08 | 0.03   | 0.03 | 0.007 | 0.008 |
| Ukraine              | Central Europe, Eastern Europe & Central Asia | 9.35   | 1.74 | 2.74  | 0.51 | 5.89   | 1.09 | 0.73  | 0.13  |
| United Arab Emirates | North Africa & Middle East                    | 8.69   | 1.32 | 3.35  | 0.51 | 4.74   | 0.72 | 0.60  | 0.09  |
| United Kingdom       | High Income                                   | 25.55  | 0.82 | 7.23  | 0.23 | 13.87  | 0.45 | 4.45  | 0.14  |
| United States        | High Income                                   | 214.61 | 1.04 | 70.55 | 0.34 | 106.67 | 0.52 | 37.39 | 0.18  |
| Uruguay              | High Income                                   | 0.64   | 0.87 | 0.18  | 0.25 | 0.34   | 0.46 | 0.12  | 0.16  |
| Uzbekistan           | Central Europe, Eastern Europe & Central Asia | 1.51   | 0.64 | 0.83  | 0.35 | 0.60   | 0.25 | 0.08  | 0.03  |
| Vanuatu              | Southeast Asia, East Asia, & Oceania          | 0.006  | 0.67 | 0.004 | 0.46 | 0.001  | 0.14 | 0.001 | 0.07  |
| Vietnam              | Southeast Asia, East Asia, & Oceania          | 8.43   | 1.09 | 5.09  | 0.66 | 2.84   | 0.37 | 0.50  | 0.06  |
| Zambia               | Sub-Saharan Africa                            | 0.17   | 0.27 | 0.12  | 0.19 | 0.04   | 0.06 | 0.009 | 0.01  |
| Zimbabwe             | Sub-Saharan Africa                            | 0.07   | 0.18 | 0.03  | 0.08 | 0.03   | 0.07 | 0.009 | 0.02  |

VLW = Value of Lost Welfare, GDP = Gross Domestic Product.
